# Supplementary material
Source: Springer Nature journal article supplement (https://www.springermedizin.de/resource/supplementary/13046_2011_494_MOESM1_ESM.pdf/9662356)

**A**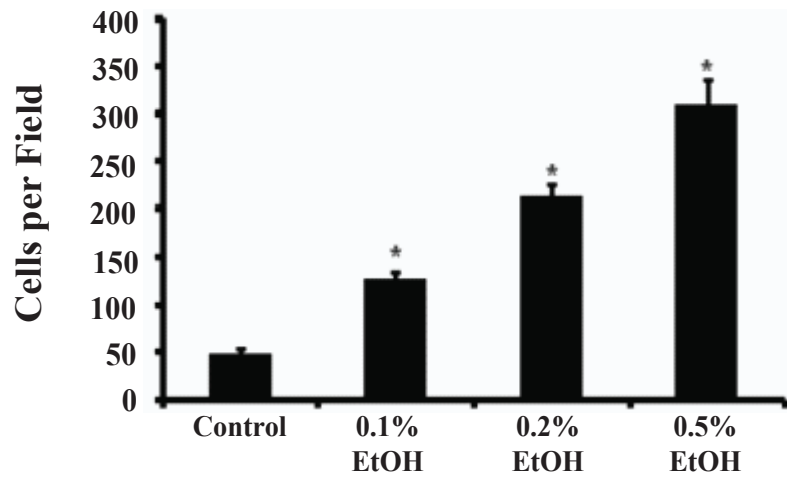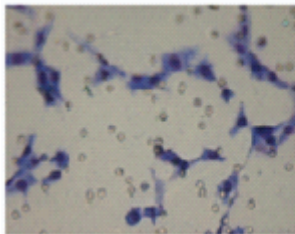**Control**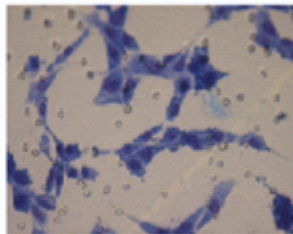**0.1% EtOH**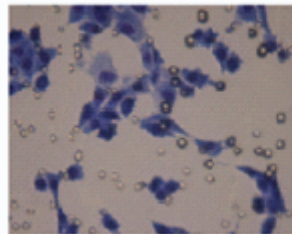**0.2% EtOH**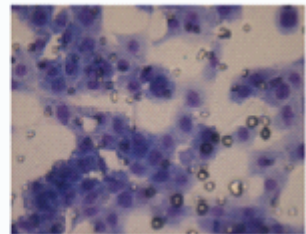**0.5% EtOH****B**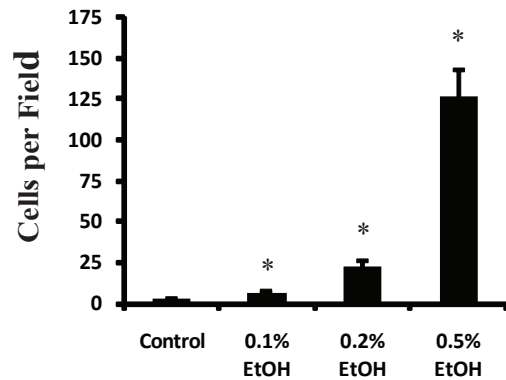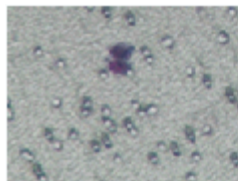**Control**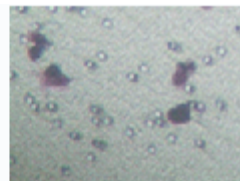**0.1% EtOH**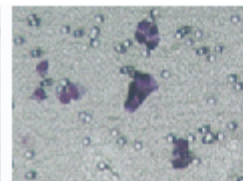**0.2% EtOH**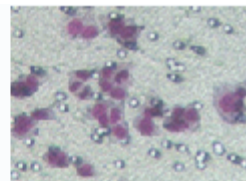**0.5% EtOH**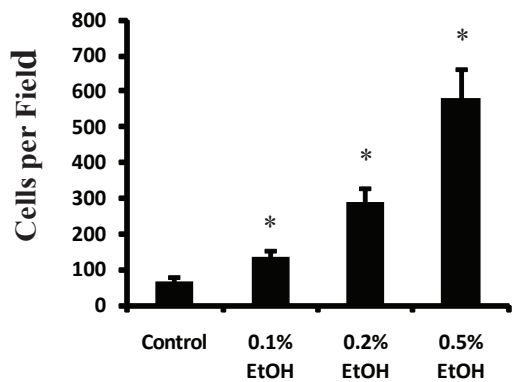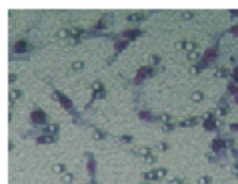**Control**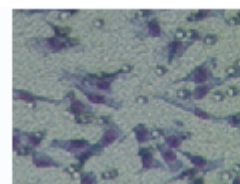**0.1% EtOH**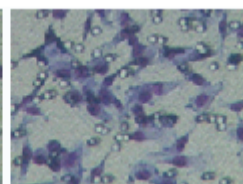**0.2% EtOH**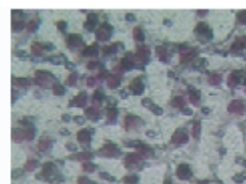**0.5% EtOH**

Supplement: MOESM1 [file 9662356]
